# Supplementary material for: Bacterial Endophytes Contribute to Rice Seedling Establishment Under Submergence
Source: PubMed Central journal article supplement (PMC9277545; doi:10.3389/fpls.2022.908349), 2022-06-29

## Supplementary Material

**Supplementary Figure 1.** Permutational multivariate analysis of variance (PERMANOVA, Weighted-Unifrac distance).

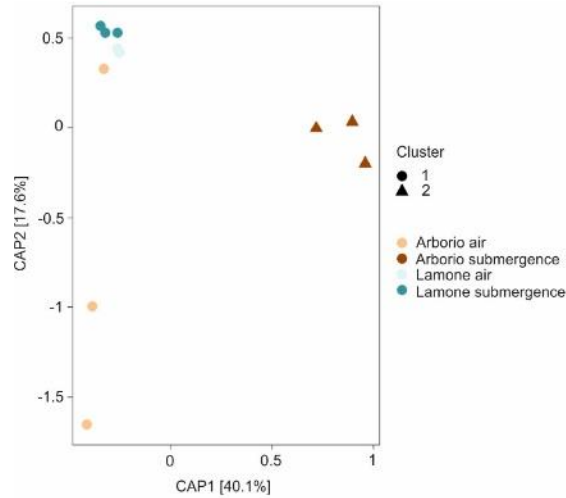

**Supplementary Figure 2.** Relative abundance of Gene Ontology (GO) molecular function of significant protein family (Pfam) prediction abundance based on MicFunPred analysis and summing the categories.

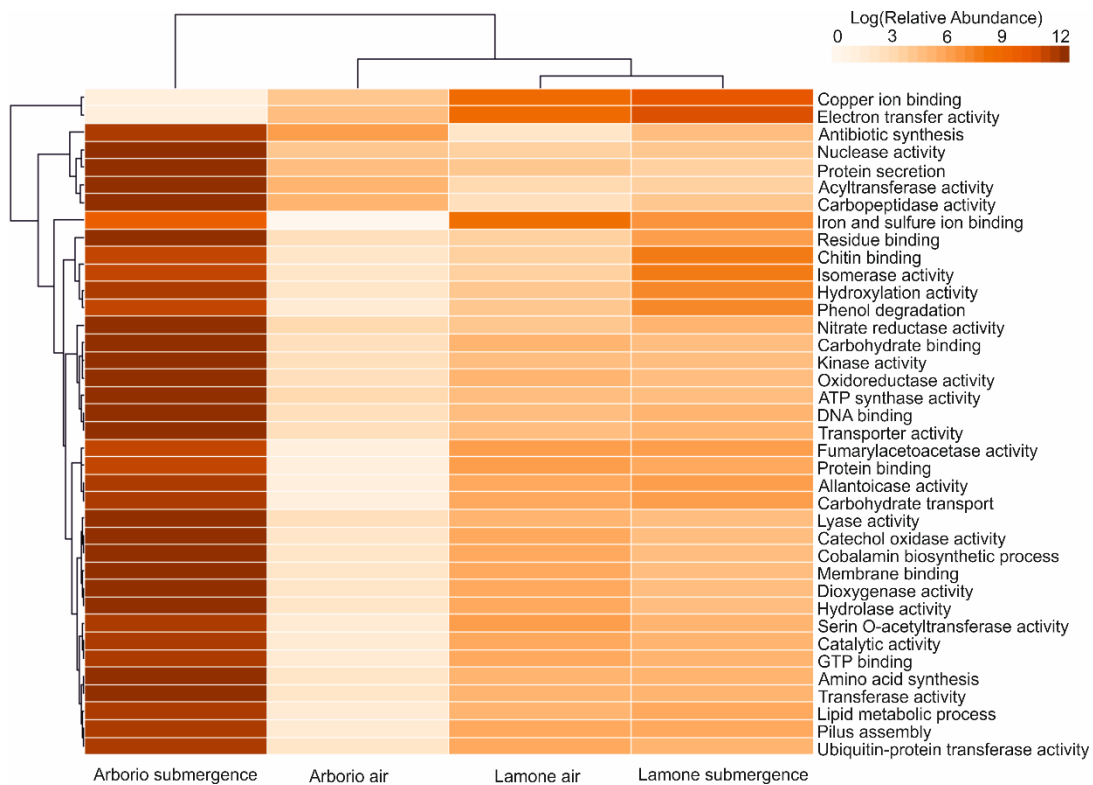

**Supplementary Figure 3** - Capacity of aerobic and hypoxic growth of isolates identified in Arborio and Lamone under submergence from **Table 2**, scored through bacterial growth in air and hypoxic conditions. The analysis was repeated three times for each isolate with similar results.

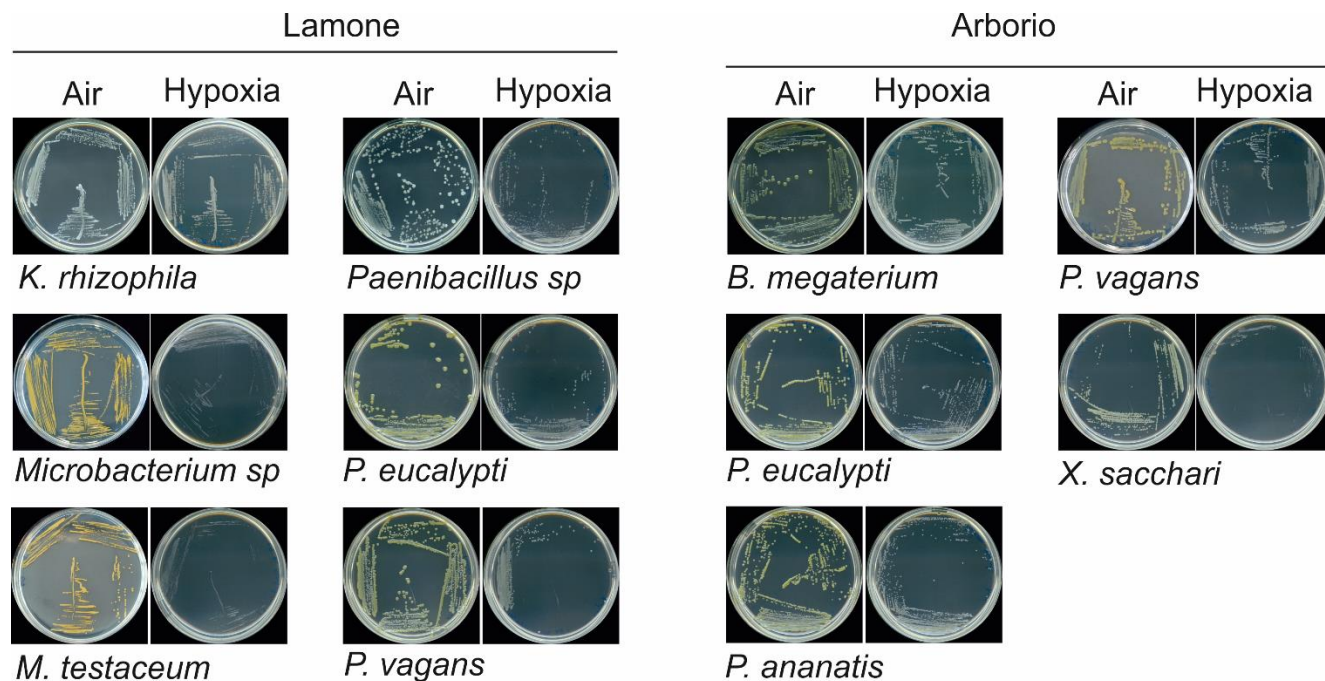

**Supplementary Figure 4.** Cefotaxime minimal inhibitory concentration (MIC) of isolates identified in Arborio and Lamone under submergence for the control of *Pantoea* spp growth *in vitro*.

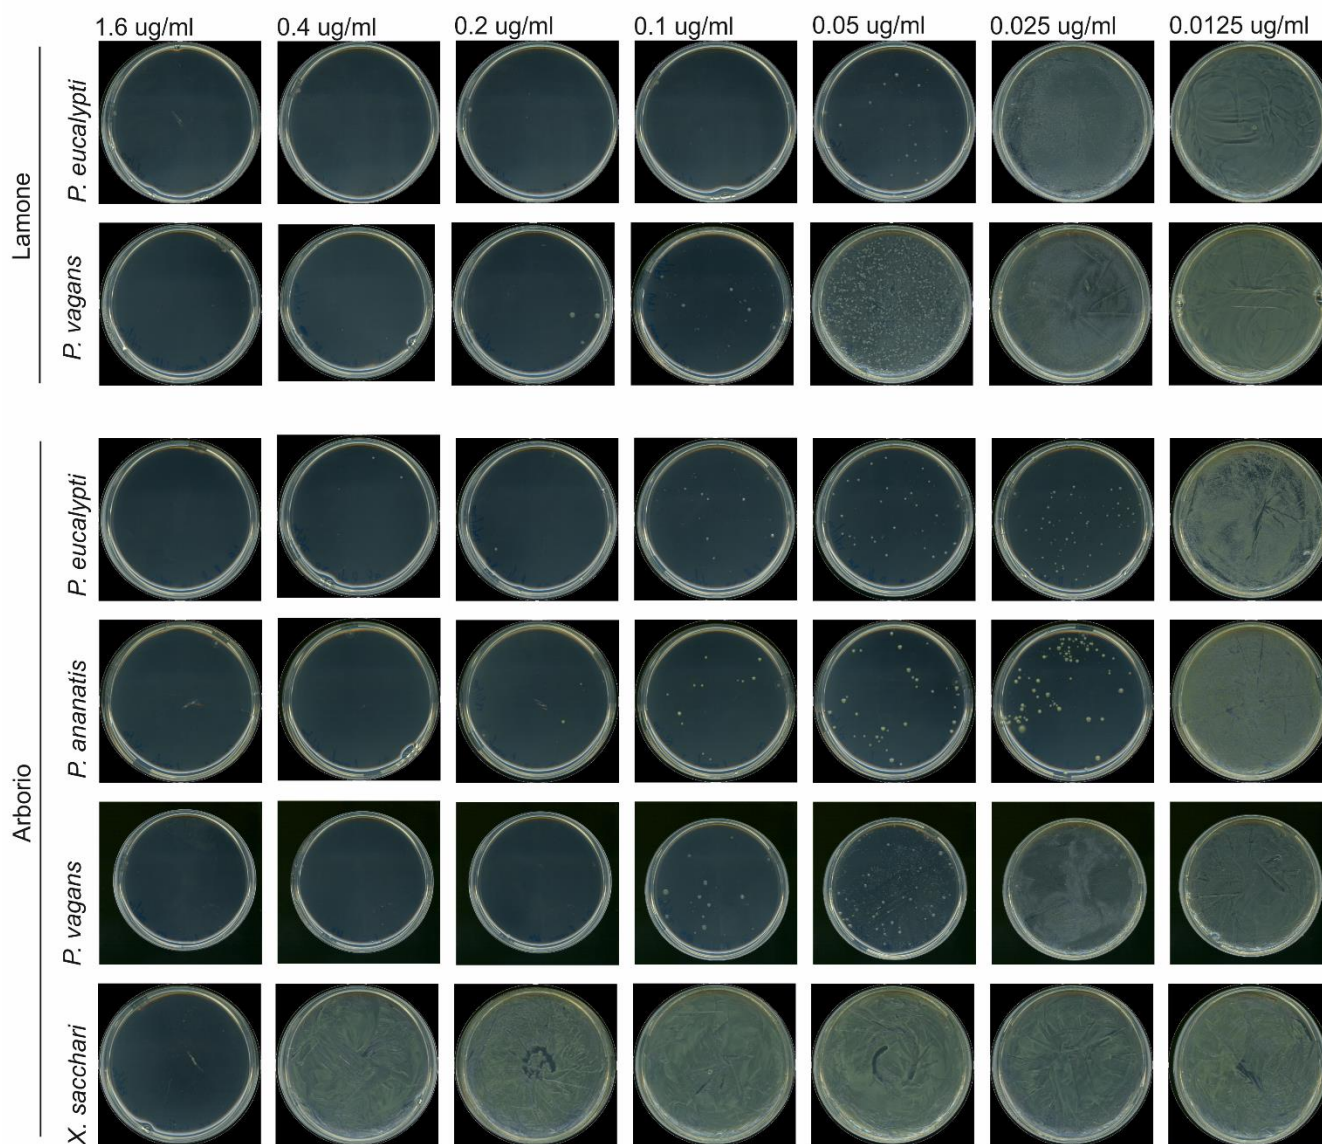

**Supplementary Figure 5.** Lamone and Arborio coleoptile length at day 4 under dark air, adding MIC 0.4 ug mL<sup>-1</sup> in the medium. Data are the mean ± SD (n=3). Anova test p<0.05.

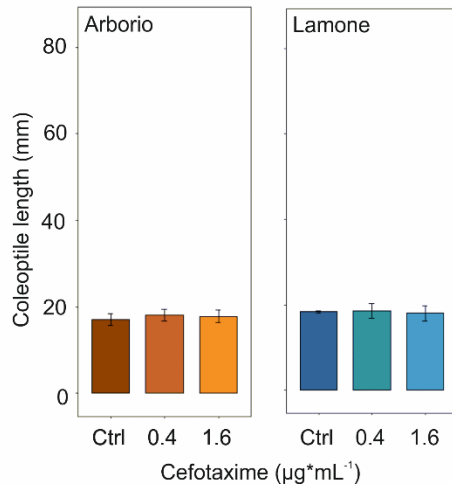

**Supplementary Figure 6.** Ermes (long) (information from **Figure 2D**) and Arsenal (short) coleoptile length with different bacteria concentrations. Data are the mean ± SD (n=3). ANOVA, p≤0.005.

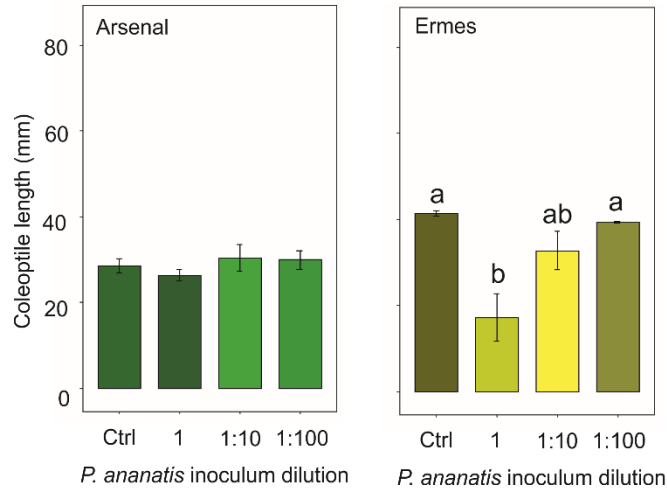

Supplement: Data_Sheet_1.pdf [file Data_Sheet_1.pdf]
